# Supplementary material for: Effects of Heat Treatment on the Microstructure and Mechanical Properties of a Dual-Phase High-Entropy Alloy Fabricated via Laser Beam Power Bed Fusion
Source: MDPI journal article supplement (doi:10.3390/mi15040471), 2024-03-29
Supplement: s1 [file s1]

# Effects of Heat Treatment on the Microstructure and Mechanical Properties of a Dual-Phase High-Entropy Alloy Fabricated via Laser Beam Power Bed Fusion

Xiaojun Tan <sup>a,b,c,d</sup>, Zihong Wang <sup>e</sup>, Haitao Chen <sup>b</sup>, Xuyun Peng <sup>b</sup>, Wei Zhang <sup>c</sup>, Haibing Xiao <sup>c,\*</sup>, Zhongmin Liu <sup>a,d</sup>, Yu Hu <sup>f,g</sup>, Liang Guo <sup>a,d,\*</sup>, Qingmao Zhang <sup>a,d</sup>

<sup>a</sup> Guangdong Provincial Key Laboratory of Nanophotonic Functional Materials and Devices, School of Information and Optoelectronic Science and Engineering, South China Normal University, Guangzhou, 510006, China

<sup>b</sup> Sino-German Intelligent Manufacturing school, Shenzhen Institute of Technology, 518116, China

<sup>c</sup> Intelligent Manufacturing and Equipment School, Shenzhen Institute of Information Technology, Shenzhen, 518172, China

<sup>d</sup> Guangdong Provincial Key Laboratory of Industrial Ultrashort Pulse Laser Technology, Shenzhen, 518055, China

<sup>e</sup> College of Materials Science and Engineering, Chongqing University, Chongqing 400045, China

<sup>f</sup> School of Locomotive and Vehicle, Guangzhou Railway Polytechnic, Guangzhou 510430, China

<sup>g</sup> Guangdong-Hongkong-Macao Joint Laboratory of Energy Saving and Intelligent Maintenance for Modern Transportations, Guangzhou 510430, China

\* Email: xiaohb@szit.edu.cn, Guoliangchn@163.com

## Supplementary Figure

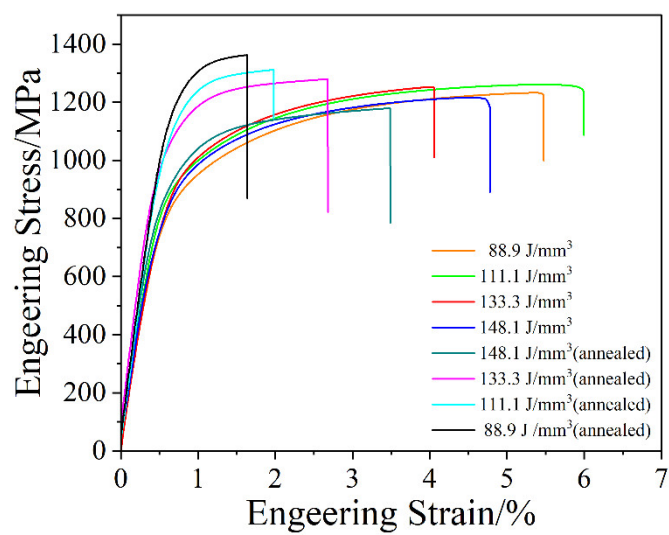

**Figure S1** Tensile stress-strain curves at room temperature of as-printed and annealed HEA samples with different VEDs
